# Supplementary material for: Ultrasound-induced reactive oxygen species generation and mitochondria-specific damage by sonodynamic agent/metal ion-doped mesoporous silica
Source: Royal Society of Chemistry journal article supplement (doi:10.1039/c9ra08142a), 2019-01-01
Supplement: c9ra08142a1.pdf [file c9ra08142a1.pdf]

## SUPPORTING INFORMATION

### Ultrasonic-induced reactive oxygen species generation and mitochondria-specific damage by sonodynamic agents / metal ion dropped mesoporous silica

*Kecan Lin<sup>a#</sup>, Ziguo Lin<sup>b#</sup>, Yujie Li<sup>c</sup>, Youshi Zheng<sup>b</sup>, Da Zhang<sup>b\*</sup>*

- The First Affiliated Hospital of Fujian Medical University, Fuzhou 350025, P. R. China.
- The United Innovation of Mengchao Hepatobiliary Technology Key Laboratory of Fujian Province, Mengchao Hepatobiliary Hospital of Fujian Medical University, Fuzhou 350025, P. R. China; The Liver Center of Fujian Province, Fujian Medical University, Fuzhou 350025, P. R. China.
- Peproductive Medicine Center, The Sixth Affiliated Hospital, Sun Yat-sen University, Guangzhou, 510000, P. R. China.

\*Coosponding author, Da Zhang. E-mail: [zdluoman1987@163.com](mailto:zdluoman1987@163.com)

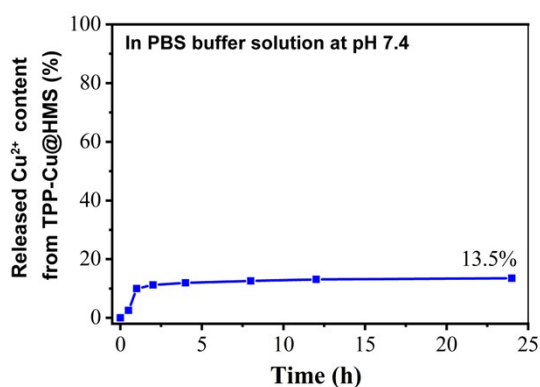

**Figure S1**, the percentage of Cu<sup>2+</sup> released from TPP-Cu@HMS under the PBS buffer solution at pH 7.4.

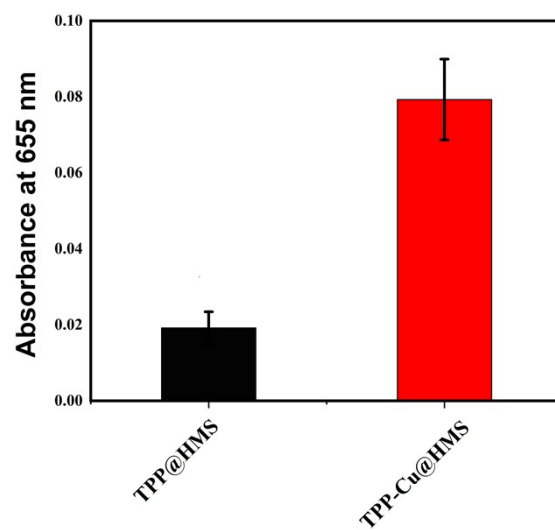

**Figure S2**, The intracellular  $\cdot\text{OH}$  generation from TPP@HMS or TPP-Cu@HMS treated HepG2 cells without US, and analyzed by adding the TMB (250  $\mu\text{M}$ ) in medium.
